# Supplementary material for: Ablation of 4E-BP1/2 Prevents Hyperglycemia-Mediated Induction of VEGF Expression in the Rodent Retina and in Müller Cells in Culture
Source: PubMed Central journal article supplement — Diabetes. 2010 Jun 14;59(9):2107–16. doi: 10.2337/db10-0148 (PMC2927931; doi:10.2337/db10-0148), 2010-06-14

## ONLINE APPENDIX

**SUPPLEMENTARY TABLE 1.** Antibodies used for protein quantitation

| Antibody        | Source                  | Catalog # | Dilution |
|-----------------|-------------------------|-----------|----------|
| 4E-BP1          | Bethyl Laboratories     | 6479/2    | 1:10,000 |
| 4E-BP1(T37/46)P | Cell Signaling          | 9459      | 1:1,000  |
| 4E-BP2          | Cell Signaling          | 2845      | 1:1,000  |
| $\beta$ -actin  | Sigma-Aldrich           | A5060     | 1:1,000  |
| eIF2            | BioSource International | 44-728G   | 1:3,000  |
| eIF4E           | Cell Signaling          | 9742      | 1:1,000  |
| eIF4E(S209)P    | Cell Signaling          | 9741      | 1:1,000  |
| eIF4G(S1108)P   | Cell Signaling          | 2441      | 1:1,000  |
| HIF-1 $\alpha$  | Novus Biologicals       | 100-654   | 1:1,000  |
| VEGF            | Santa Cruz              | 7269      | 1:500    |

**SUPPLEMENTARY TABLE 2**

Primers used for quantitation of mRNA expression by quantitative real-time PCR.

| mRNA           | Primer Sequence                                                   |
|----------------|-------------------------------------------------------------------|
| $\beta$ -actin | CTTCCTTCCTGGGTATGGAATCCTG                                         |
| VEGFA          | CTCCACCATGCCAAGTGGTCCCAGG (designed to detect all VEGFA isoforms) |
| FoxO1          | TCTCTAATTCTTGAGGGGTGGTTGC                                         |
| 4E-BP1         | CACCCCGGGAGGAACCAGAATCATC                                         |
| Gadd45         | GCTGGTGACGAACCCACATTCATCA                                         |
| p300           | AGCGATGGCACAGATTTTGGTTTCAC                                        |
| Angiopoietin2  | GAACAGCTTCCTAGAAAAGAAAGTG                                         |

**Supplemental Figure 1.** Blood glucose concentrations in control and STZ-induced diabetic rats and mice and in wildtype and INS2Akita diabetic mice. **(A)** Type 1 diabetes was induced in male Sprague-Dawley rats. Values presented represent the mean  $\pm$  SEM of 51 control and 71 diabetic rats at 1 week, 25 control and 30 diabetic rats at 2 weeks, 10 control and 17 diabetic rats at 4 weeks, and 10 control and 14 diabetic rats at 6 weeks; control (white bars) and diabetic (hatched bars). \*\*\*  $p < 0.001$  vs control at the same time point. **(B)** male C57BL/6J Ins2Akita heterozygous mice (4.5 week old) were genotyped and blood glucose concentrations were assessed; littermates homozygous for the wildtype Ins2 gene were used as controls. Values represent the mean  $\pm$  SEM of 16 control and 16 diabetic mice at 6 weeks, 20 control and 14 diabetic mice at 16 weeks, and 13 control and 15 diabetic mice at 24 weeks; control (white bars) and diabetic (Hatched bars). \*\*\*  $p < 0.001$  vs wildtype at the same time point. **(C)** At 4 weeks of age, type 1 diabetes was induced in Eif4ebp1;Eif4ebp2 DKO mice as described. The study was repeated 3 times and the aggregate data are shown. Values represent the mean  $\pm$  SEM for 20 wildtype control (white bars), 29 wildtype diabetic (white, hatched bars), 18 DKO control (grey bars), and 30 DKO diabetic (gray, hatched bars) mice. \*  $p < 0.001$  wildtype diabetic vs control at the same time point. †  $p < 0.001$  DKO diabetic vs control at the same time point.

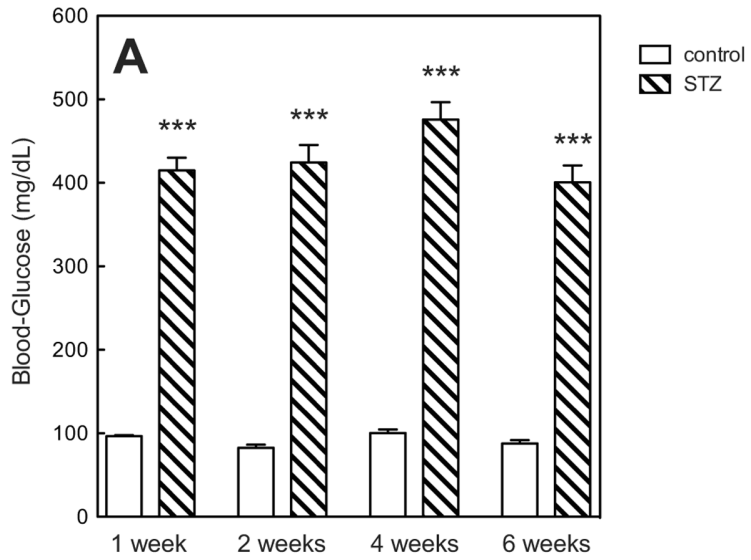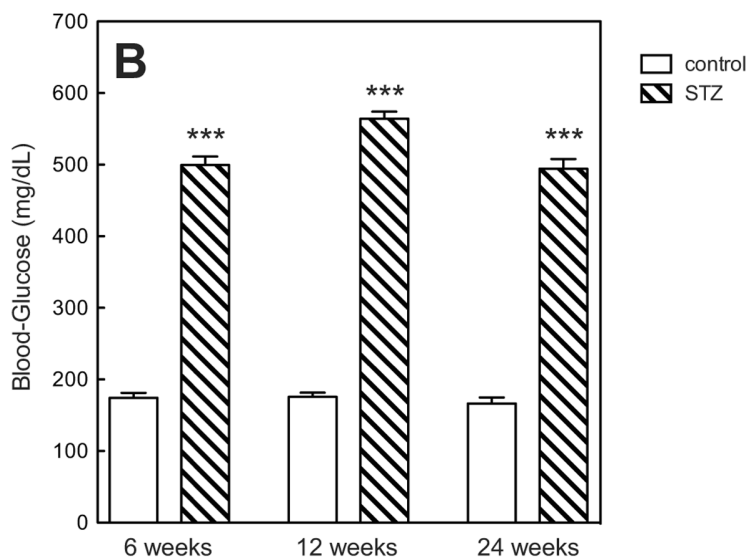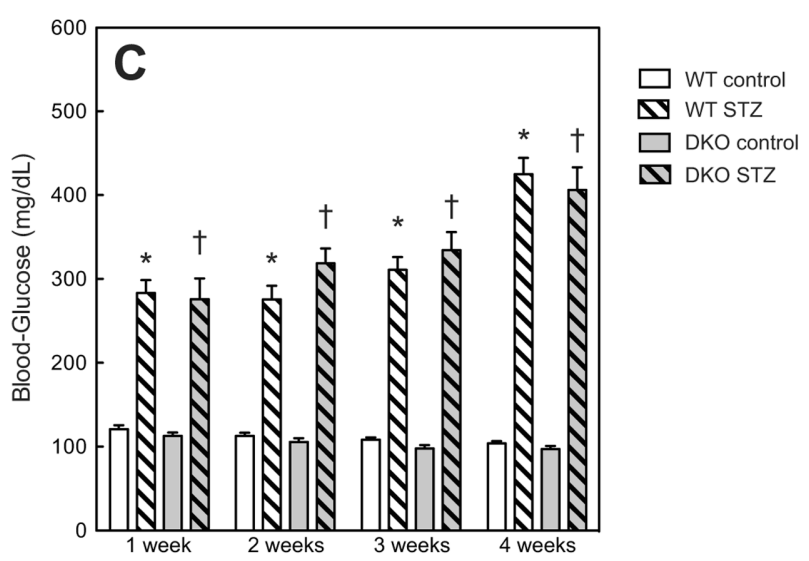

Supplement: supp_db10-0148_DB100148ONLINEAPPENDIX.pdf [file supp_db10-0148_DB100148ONLINEAPPENDIX.pdf]
